# Supplementary material for: QTL Mapping of the Shape of Type VI Glandular Trichomes in Tomato
Source: Front Plant Sci. 2018 Sep 26;9:1421. doi: 10.3389/fpls.2018.01421 (PMC6168718; doi:10.3389/fpls.2018.01421)
Supplement: TABLE S3 — Genes of the QTL on chromosome I. [file Table_3.XLSX]

## Sheet: Tabelle1
Genes in the QTL region of chromosome I controlling type VI trichome shape
ID	BLAST_ITAG2.3	BLASTx2GO_NRPEP
Solyc01g111610.2.1	Protein binding protein (AHRD V1 **-- D7L0L7_ARALY)	ring finger protein b-like
Solyc01g108530.2.1	Acetyl esterase (AHRD V1 *--- AES_SALPB); contains Interpro domain(s) IPR013094 Alpha/beta hydrolase fold-3	probable carboxylesterase 2-like
Solyc01g108550.1.1	Unknown Protein (AHRD V1)	hypothetical protein SORBIDRAFT_03g001790
Solyc01g111950.2.1	Receptor-like kinase (AHRD V1 *-*- A7VM42_MARPO); contains Interpro domain(s) IPR002290 Serine/threonine protein kinase	receptor-like cytosolic serine threonine-protein kinase rbk1-like
Solyc01g110340.2.1	Endoglucanase 1 (AHRD V1 ***- B6U0P7_MAIZE); contains Interpro domain(s) IPR001701 Glycoside hydrolase, family 9	endoglucanase 24-like
Solyc01g108880.2.1	1-aminocyclopropane-1-carboxylate oxidase (AHRD V1 **-* ACCO_MUSAC); contains Interpro domain(s) IPR005123 Oxoglutarate and iron-dependent oxygenase	gibberellin 20 oxidase 1-like
Solyc01g111350.2.1	Nodulin family protein (AHRD V1 ***- D7MDH3_ARALY); contains Interpro domain(s) IPR010658 Nodulin-like	nodulin family protein
Solyc01g108670.2.1	Kinesin-like protein (AHRD V1 *-*- Q75LL2_ORYSJ); contains Interpro domain(s) IPR001752 Kinesin, motor region	phragmoplast orienting kinesin 2-like
Solyc01g108580.2.1	Gibberellin receptor GID1L2 (AHRD V1 **-- B6TRC0_MAIZE); contains Interpro domain(s) IPR013094 Alpha/beta hydrolase fold-3	probable carboxylesterase 7-like
Solyc01g108100.2.1	Unknown Protein (AHRD V1)	cold regulated gene isoform 1
Solyc01g107390.2.1	Auxin-responsive GH3 product (AHRD V1 ***- Q05680_SOYBN); contains Interpro domain(s) IPR004993 GH3 auxin-responsive promoter	probable indole-3-acetic acid-amido synthetase -like
Solyc01g108230.2.1	LAG1 longevity assurance homolog 2 (AHRD V1 **-- C1BLI2_OSMMO); contains Interpro domain(s) IPR006634 TRAM, LAG1 and CLN8 homology	lag1 longevity assurance homolog 2-like
Solyc01g107520.2.1	PBSP domain-containing protein (AHRD V1 **-- C9S7G7_VERA1); contains Interpro domain(s) IPR007541 Plant Basic Secretory Protein	plant basic secretory family protein
Solyc01g109120.2.1	WD-40 repeat family protein (AHRD V1 **-- Q1EPE0_MUSAC); contains Interpro domain(s) IPR020472 G-protein beta WD-40 repeat, region	uncharacterized wd repeat-containing protein alr3466-like
Solyc01g108120.2.1	B3 domain-containing protein At3g19184 (AHRD V1 *-*- Y3918_ARATH); contains Interpro domain(s) IPR003340 Transcriptional factor B3	b3 domain-containing protein os01g0234100-like
Solyc01g108080.2.1	BZIP transcription factor (AHRD V1 **-* Q0PN11_9FABA); contains Interpro domain(s) IPR011616 bZIP transcription factor, bZIP-1	abscisic acid-insensitive 5-like protein 7-like isoform x1
Solyc01g110290.2.1	Squalene synthase (AHRD V1 ***- D0VFU8_SOLLC); contains Interpro domain(s) IPR006449 Farnesyl-diphosphate farnesyltransferase	squalene synthase
Solyc01g110370.2.1	Zinc finger protein CONSTANS-LIKE 3 (AHRD V1 *--- COL3_ARATH); contains Interpro domain(s) IPR000315 Zinc finger, B-box	probable salt tolerance-like protein at1g78600-like
Solyc01g107920.2.1	Os07g0175100 protein (Fragment) (AHRD V1 ***- Q0D898_ORYSJ)	nuclease harbi1-like
Solyc01g109300.2.1	4-hydroxy-3-methylbut-2-enyl diphosphate reductase (AHRD V1 ***- A2TGW4_9LAMI); contains Interpro domain(s) IPR003451 LytB protein	4-hydroxy-3-methylbut-2-enyl diphosphate reductase
Solyc01g109980.2.1	BEL1-like homeodomain protein 6 (AHRD V1 *--- BLH6_ARATH); contains Interpro domain(s) IPR006563 POX	bel1-like homeodomain protein 6-like
Solyc01g110460.2.1	3-oxo-5-alpha-steroid 4-dehydrogenase family protein (AHRD V1 **** D7M2L5_ARALY); contains Interpro domain(s) IPR001104 3-oxo-5-alpha-steroid 4-dehydrogenase, C-terminal	polyprenol reductase 2-like
Solyc01g109590.2.1	Receptor-like protein kinase (AHRD V1 ***- Q9LYS5_ARATH); contains Interpro domain(s) IPR002290 Serine/threonine protein kinase	probable receptor-like serine threonine-protein kinase at4g34500-like
Solyc01g107170.2.1	Zinc finger protein (AHRD V1 ***- A0T3Q5_SOLTU); contains Interpro domain(s) IPR007087 Zinc finger, C2H2-type	zinc finger protein
Solyc01g111500.2.1	MYB transcription factor (AHRD V1 **** B9H191_POPTR); contains Interpro domain(s) IPR015495 Myb transcription factor	myb-related protein 308-like
Solyc01g109170.2.1	Cold acclimation protein COR413-like (AHRD V1 ***- A6YDU6_LOLTE); contains Interpro domain(s) IPR008892 Cold acclimation WCOR413	wcor413-like protein
Solyc01g108910.2.1	COSII_At2g15890 (Fragment) (AHRD V1 *-*- C0KFD9_9SOLN)	maternal effect embryo arrest 14 isoform 1
Solyc01g111370.2.1	Choline transporter like family (AHRD V1 *-*- C1FD31_9CHLO); contains Interpro domain(s) IPR007603 Protein of unknown function DUF580	choline transporter-like protein 1-like
Solyc01g107340.2.1	Unknown Protein (AHRD V1)	copper ion binding
Solyc01g110760.1.1	Unknown Protein (AHRD V1)	membrane protein
Solyc01g108250.2.1	Vacuolar import and degradation protein VID27 (AHRD V1 *--- B3LP56_YEAS1); contains Interpro domain(s) IPR013863 Vacuolar import and degradation, Vid27-related	protein cypro4-like
Solyc01g111080.2.1	Gibberellin-regulated protein 2 (AHRD V1 *--- B6UGG6_MAIZE); contains Interpro domain(s) IPR003854 Gibberellin regulated protein	gibberellin-regulated protein
Solyc01g107180.2.1	Phototropic-responsive NPH3 family protein (AHRD V1 **-- D7M5U6_ARALY); contains Interpro domain(s) IPR004249 NPH3	btb poz domain-containing protein npy2-like
Solyc01g112190.2.1	Nodule inception protein (Fragment) (AHRD V1 ***- A9DMJ4_MEDTR); contains Interpro domain(s) IPR003035 Plant regulator RWP-RK	protein nlp2-like
Solyc01g107250.2.1	LRR receptor-like serine/threonine-protein kinase, RLP	somatic embryogenesis receptor kinase 1-like
Solyc01g111640.2.1	Skp1 (AHRD V1 ***- Q49HP3_CAPAN); contains Interpro domain(s) IPR016897 E3 ubiquitin ligase, SCF complex, Skp subunit	skp1-like protein 1b-like
Solyc01g111800.2.1	Amino acid permease (Fragment) (AHRD V1 ***- B8C3S3_THAPS); contains Interpro domain(s) IPR002293 Amino acid/polyamine transporter I	probable polyamine transporter at1g31830-like
Solyc01g108110.2.1	Alpha 1 3 fucosyltransferase (AHRD V1 **** Q5DTC8_MEDSA); contains Interpro domain(s) IPR001503 Glycosyl transferase, family 10	alpha fucosyltransferase
Solyc01g107210.2.1	AT2G14850 protein (Fragment) (AHRD V1 *-*- B9DHZ5_ARATH)	PREDICTED: uncharacterized protein LOC101268618
Solyc01g110390.2.1	NADH dehydrogenase (AHRD V1 **** NDUB9_MOUSE); contains Interpro domain(s) IPR008011 Complex 1 LYR protein	nadh dehydrogenase
Solyc01g110380.2.1	Kinesin like protein (AHRD V1 *-*- Q0WLK7_ARATH); contains Interpro domain(s) IPR001752 Kinesin, motor region	kinesin motor family protein
Solyc01g110690.2.1	Unknown Protein (AHRD V1)	dna mismatch repair protein mlh3-like isoform x11
Solyc01g111260.2.1	Phosphatidylinositol-specific phospholipase c (AHRD V1 *-*- B9UY71_LISMO); contains Interpro domain(s) IPR017946 PLC-like phosphodiesterase, TIM beta/alpha-barrel domain	phosphoinositide-specific phospholipase c
Solyc01g111910.2.1	RNA polymerase II-associated protein 1 (AHRD V1 *-*- RPAP1_HUMAN); contains Interpro domain(s) IPR013930 RNA polymerase II-associated protein 1, N-terminal	rna polymerase ii-associated protein
Solyc01g109780.2.1	Unknown Protein (AHRD V1)	f-box protein at2g16365-like
Solyc01g108570.2.1	Gibberellin receptor GID1L2 (AHRD V1 **-- B6TRC0_MAIZE); contains Interpro domain(s) IPR013094 Alpha/beta hydrolase fold-3	probable carboxylesterase 7-like
Solyc01g109600.2.1	Unknown Protein (AHRD V1)	btb poz domain-containing protein at1g63850-like
Solyc01g108970.2.1	Phox domain-containing protein (AHRD V1 ***- D7L592_ARALY); contains Interpro domain(s) IPR001683 Phox-like	uncharacterized partial
Solyc01g109310.2.1	Multidrug resistance protein mdtK (AHRD V1 ***- MDTK_ERWAM); contains Interpro domain(s) IPR002528 Multi antimicrobial extrusion protein MatE	protein transparent testa 12-like
Solyc01g109180.2.1	Long-chain-fatty-acid-CoA ligase (AHRD V1 ***- B2WS80_ARAHA); contains Interpro domain(s) IPR000873 AMP-dependent synthetase and ligase	long chain acyl- synthetase 2-like
Solyc01g110650.2.1	Unknown Protein (AHRD V1)	dna mismatch repair protein mlh3-like isoform x11
Solyc01g108560.2.1	Acetyl esterase (AHRD V1 *--- AES_SHIFL); contains Interpro domain(s) IPR013094 Alpha/beta hydrolase fold-3	probable carboxylesterase 7-like
Solyc01g107780.2.1	UDP-glucosyltransferase family 1 protein (AHRD V1 **** C6KI43_CITSI); contains Interpro domain(s) IPR002213 UDP-glucuronosyl/UDP-glucosyltransferase	scopoletin glucosyltransferase-like
Solyc01g108020.2.1	Thioredoxin m (AHRD V1 ***- B9HS17_POPTR); contains Interpro domain(s) IPR015467 Thioredoxin, core	thioredoxin m
Solyc01g111940.2.1	Coiled-coil domain-containing protein 124 (AHRD V1 *-*- CC124_XENTR); contains Interpro domain(s) IPR010422 Protein of unknown function DUF1014	coiled-coil domain-containing protein 124-a-like
Solyc01g109010.2.1	Unknown Protein (AHRD V1)	sorting nexin-16
Solyc01g110640.1.1	Unknown Protein (AHRD V1)	dna mismatch repair protein mlh3-like isoform x5
Solyc01g111450.2.1	Proteasome subunit alpha type (AHRD V1 ***- Q38HT8_SOLTU); contains Interpro domain(s) IPR000426 Proteasome, alpha-subunit, conserved site	proteasome subunit alpha type-7-like
Solyc01g107740.2.1	Protein unc-13 homolog C (AHRD V1 *--- UN13C_MOUSE); contains Interpro domain(s) IPR018029 C2 membrane targeting protein	elicitor-responsive protein 1-like isoform 2
Solyc01g109830.2.1	Thymidylate synthase (AHRD V1 ***- D8LWN8_BLAHO); contains Interpro domain(s) IPR012262 Bifunctional dihydrofolate reductase/thymidylate synthase	bifunctional dihydrofolate reductase-thymidylate synthase-like
Solyc01g108030.2.1	Methylcrotonoyl-CoA carboxylase beta subunit (AHRD V1 **** D4XQJ0_ACIHA); contains Interpro domain(s) IPR000022 Carboxyl transferase	methylcrotonoyl- carboxylase beta mitochondrial-like
Solyc01g111810.2.1	Structural constituent of ribosome (AHRD V1 **-- D7KIV9_ARALY); contains Interpro domain(s) IPR005484 Ribosomal protein L18/L5	ribosomal l5e family protein isoform 5
Solyc01g111690.2.1	Trafficking protein particle complex subunit 2-like protein (AHRD V1 ***- D0N1W2_PHYIN); contains Interpro domain(s) IPR006722 Sedlin	trafficking protein particle complex subunit 2-like
Solyc01g110280.2.1	DNA-damage-inducible protein F (AHRD V1 **-- B4V9L8_9ACTO); contains Interpro domain(s) IPR002528 Multi antimicrobial extrusion protein MatE	mate efflux family protein chloroplastic-like
Solyc01g107700.2.1	Kynurenine formamidase (AHRD V1 **-- D7BCL0_MEISD); contains Interpro domain(s) IPR007325 Putative cyclase	kynurenine formamidase-like
Solyc01g110000.2.1	Beta-galactosidase (AHRD V1 ***- B9H0V1_POPTR); contains Interpro domain(s) IPR001944 Glycoside hydrolase, family 35	beta-galactosidase 3-like
Solyc01g108410.1.1	Pentatricopeptide repeat-containing protein (AHRD V1 ***- D7M761_ARALY); contains Interpro domain(s) IPR002885 Pentatricopeptide repeat	pentatricopeptide repeat-containing protein at5g39710-like
Solyc01g111890.2.1	F-box/LRR-repeat protein 14 (AHRD V1 *-*- B5X1Y2_SALSA); contains Interpro domain(s) IPR001810 Cyclin-like F-box	f-box lrr-repeat protein 10-like
Solyc01g109360.2.1	Tyrosyl-tRNA synthetase (AHRD V1 **** P93363_TOBAC); contains Interpro domain(s) IPR016485 Tyrosine tRNA ligase, archaeal/eukaryotic	tyrosine--trna ligase-like
Solyc01g107620.2.1	Reticulon family protein (AHRD V1 ***- D7L3K1_ARALY); contains Interpro domain(s) IPR003388 Reticulon	reticulon-like protein b11-like
Solyc01g108150.2.1	Oxidoreductase zinc-binding dehydrogenase family protein (AHRD V1 *--- Q22RF9_TETTH); contains Interpro domain(s) IPR002085 Alcohol dehydrogenase superfamily, zinc-containing	zinc-binding alcohol dehydrogenase domain-containing protein 2-like
Solyc01g112200.2.1	Pentatricopeptide repeat-containing protein (AHRD V1 ***- D7L8S9_ARALY); contains Interpro domain(s) IPR002885 Pentatricopeptide repeat	pentatricopeptide repeat-containing protein at2g17210-like
Solyc01g108960.1.1	Unknown Protein (AHRD V1)	phosphoinositide phospholipase c plc1
Solyc01g110890.1.1	Auxin-induced SAUR-like protein (AHRD V1 ***- Q8S351_CAPAN); contains Interpro domain(s) IPR003676 Auxin responsive SAUR protein	auxin-induced protein x10a-like
Solyc01g110740.2.1	Unknown Protein (AHRD V1)	hth-type ribose operon repressor rbsr
Solyc01g107770.1.1	UDP-glucosyltransferase family 1 protein (AHRD V1 **** C6KI43_CITSI); contains Interpro domain(s) IPR002213 UDP-glucuronosyl/UDP-glucosyltransferase	scopoletin glucosyltransferase-like
Solyc01g109620.2.1	NADH-quinone oxidoreductase subunit I (AHRD V1 **** D5BPB0_PUNMI); contains Interpro domain(s) IPR001450 4Fe-4S ferredoxin, iron-sulphur binding, subgroup	nadh dehydrogenase
Solyc01g107130.2.1	Vacuolar sorting receptor (AHRD V1 ***- Q93X09_VIGMU); contains Interpro domain(s) IPR003137 Protease-associated PA	vacuolar-sorting receptor 3-like
Solyc01g110020.2.1	BAH-PHD domain-containing protein (Fragment) (AHRD V1 **-- A9S8N5_PHYPA); contains Interpro domain(s) IPR001025 Bromo adjacent region	bah and coiled-coil domain-containing protein 1-like
Solyc01g107160.2.1	Mitotic checkpoint protein BUB3 (AHRD V1 **-- B6UH61_MAIZE); contains Interpro domain(s) IPR020472 G-protein beta WD-40 repeat, region	mitotic checkpoint protein bub3-like
Solyc01g112170.2.1	Calcium-dependent protein kinase (AHRD V1 **-* Q9S7Z4_MARPO); contains Interpro domain(s) IPR011992 EF-Hand type	sorcin-like isoform 2
Solyc01g107240.2.1	Peroxisomal membrane MPV17/PMP22-like protein (AHRD V1 *--- A8J1X1_CHLRE); contains Interpro domain(s) IPR007248 Mpv17/PMP22	pxmp2 4 family protein 4-like
Solyc01g112210.2.1	Glycosyltransferase (AHRD V1 ***- B9IC41_POPTR); contains Interpro domain(s) IPR002495 Glycosyl transferase, family 8	probable galacturonosyltransferase 3-like
Solyc01g111860.2.1	DDB1- and CUL4-associated factor 8-like protein 1 (AHRD V1 **-- DC8L1_XENLA); contains Interpro domain(s) IPR017986 WD40 repeat, region	ddb1- and cul4-associated factor 8-like
Solyc01g108340.2.1	Peptidyl-prolyl cis-trans isomerase D (AHRD V1 **** PPID_RAT); contains Interpro domain(s) IPR002130 Peptidyl-prolyl cis-trans isomerase, cyclophilin-type	peptidyl-prolyl cis-trans isomerase cyp40-like
Solyc01g112010.2.1	Pre-rRNA-processing protein ESF2 (AHRD V1 ***- D0MVG4_PHYIN)	pre-rrna-processing protein esf2-like
Solyc01g111240.2.1	Translocase of chloroplast 90, chloroplastic (AHRD V1 *--- TOC90_ARATH); contains Interpro domain(s) IPR005690 Chloroplast protein import component Toc86/159	translocase of chloroplast chloroplastic-like
Solyc01g109970.2.1	DNA repair protein (AHRD V1 *--- Q2UQK2_ASPOR); contains Interpro domain(s) IPR001650 DNA/RNA helicase, C-terminal	dna repair and recombination protein rad54-like
Solyc01g111210.2.1	Glutamyl-tRNA(Gln) amidotransferase subunit A (AHRD V1 ***- B6JZE9_SCHJY); contains Interpro domain(s) IPR000120 Amidase signature enzyme	amidase -like
Solyc01g109870.2.1	SEC14-like protein (AHRD V1 **-- Q9T026_ARATH); contains Interpro domain(s) IPR001251 Cellular retinaldehyde-binding/triple function, C-terminal	phosphatidylinositol phosphatidylcholine transfer protein sfh8-like
Solyc01g112340.2.1	Guanine nucleotide exchange family protein (AHRD V1 ***- D7MEW8_ARALY)	brefeldin a-inhibited guanine nucleotide-exchange protein 1-like
Solyc01g108920.2.1	Serine/threonine-protein kinase Sgk3 (AHRD V1 *--- SGK3_RAT); contains Interpro domain(s) IPR001683 Phox-like	phox-associated - c- isoform 1
Solyc01g111730.2.1	Phosphatase 2C family protein (AHRD V1 ***- D7MEZ6_ARALY); contains Interpro domain(s) IPR015655 Protein phosphatase 2C	probable protein phosphatase 2c 64-like
Solyc01g109080.2.1	Protein kinase (AHRD V1 *-*- D3AX52_POLPA); contains Interpro domain(s) IPR000403 Phosphatidylinositol 3- and 4-kinase, catalytic	serine threonine-protein kinase smg1-like isoform x1
Solyc01g109000.1.1	Unknown Protein (AHRD V1)	b3 domain-containing protein at5g66980-like
Solyc01g112240.2.1	Alpha-1 3-mannosyl-glycoprotein beta-1 2-N-acetylglucosaminyltransferase (AHRD V1 **** Q9ST97_TOBAC); contains Interpro domain(s) IPR004139 Glycosyl transferase, family 13	n-acetylglucosaminyltransferase i
Solyc01g111680.2.1	Ubiquitin-conjugating enzyme 22 (AHRD V1 ***- D7L888_ARALY); contains Interpro domain(s) IPR000608 Ubiquitin-conjugating enzyme, E2	probable ubiquitin-conjugating enzyme e2 23-like
Solyc01g110030.2.1	WD-40 repeat protein (AHRD V1 **-- B2IVX2_NOSP7); contains Interpro domain(s) IPR017986 WD40 repeat, region	wd repeat-containing protein 13-like
Solyc01g107360.2.1	Coatomer subunit beta&apos; (AHRD V1 *--- COPB2_DICDI); contains Interpro domain(s) IPR017986 WD40 repeat, region	transducin family protein wd-40 repeat family protein
Solyc01g111920.2.1	F-box family protein (AHRD V1 ***- B9HR11_POPTR); contains Interpro domain(s) IPR005174 Protein of unknown function DUF295	f-box protein skip23-like
Solyc01g109070.2.1	Diphthamide biosynthesis protein 3 (AHRD V1 ***- B6SIS6_MAIZE); contains Interpro domain(s) IPR007872 Zinc finger, DPH-type	dph3 homolog
Solyc01g111410.2.1	Protein prenyltransferase alpha subunit repeat-containing protein 1 (AHRD V1 *-*- PTAR1_HUMAN); contains Interpro domain(s) IPR008940 Protein prenyltransferase	protein prenyltransferase
Solyc01g109210.2.1	Unknown Protein (AHRD V1)	serine carboxypeptidase-like 18
Solyc01g111190.2.1	Magnesium transporter NIPA2 (AHRD V1 *-*- NIPA2_BOVIN); contains Interpro domain(s) IPR008521 Protein of unknown function DUF803	magnesium transporter nipa2-like
Solyc01g109990.2.1	RNA-binding protein 28 (AHRD V1 *--- B0X2T7_CULQU); contains Interpro domain(s) IPR012677 Nucleotide-binding, alpha-beta plait	rna-binding protein 28-like
Solyc01g107750.2.1	Phosphatase and tensin-like A (AHRD V1 *--- C5IX04_APIME); contains Interpro domain(s) IPR014020 Tensin phosphatase, C2 domain	phosphatidylinositol -trisphosphate 3-phosphatase and dual-specificity protein phosphatase pten-like isoform x1
Solyc01g111650.2.1	Skp1 (AHRD V1 ***- Q49HP3_CAPAN); contains Interpro domain(s) IPR016897 E3 ubiquitin ligase, SCF complex, Skp subunit	skp1-like protein 1b-like
Solyc01g108060.1.1	Propionyl-CoA carboxylase (AHRD V1 ***- A4ENA2_9RHOB); contains Interpro domain(s) IPR000022 Carboxyl transferase	methylcrotonoyl- carboxylase beta mitochondrial-like
Solyc01g107310.2.1	Phosphatase 2C family protein (AHRD V1 ***- D7MFT9_ARALY); contains Interpro domain(s) IPR015655 Protein phosphatase 2C	probable protein phosphatase 2c 63-like
Solyc01g111580.2.1	BZIP family transcription factor (Fragment) (AHRD V1 *-*- D7LU06_ARALY); contains Interpro domain(s) IPR011700 Basic leucine zipper	bzip transcription factor family protein 2
Solyc01g111140.2.1	Protein FAM50 homolog (AHRD V1 *--- FAM50_DROPS); contains Interpro domain(s) IPR007005 XAP5 protein	protein xap5 circadian timekeeper-like
Solyc01g107860.2.1	CBS domain-containing protein-like (AHRD V1 ***- B8AP73_ORYSI); contains Interpro domain(s) IPR000644 Cystathionine beta-synthase, core	cbs domain-containing protein chloroplastic-like
Solyc01g110150.2.1	CM0216.450.nc protein (AHRD V1 *-*- B0BL92_LOTJA)	histone-lysine n-methyltransferase setd1b-like
Solyc01g109550.2.1	Mitochondrial transcription termination factor (Fragment) (AHRD V1 *--- C6FB12_PSEMZ); contains Interpro domain(s) IPR003690 Mitochodrial transcription termination factor-related	mitochondrial transcription termination factor family protein
Solyc01g109340.2.1	RING finger protein 5 (AHRD V1 **-- B6UBI0_MAIZE); contains Interpro domain(s) IPR001841 Zinc finger, RING-type	ring finger protein 5-like isoform x1
Solyc01g108180.2.1	Pentatricopeptide repeat-containing protein (AHRD V1 ***- D7MA46_ARALY); contains Interpro domain(s) IPR002885 Pentatricopeptide repeat	pentatricopeptide repeat-containing protein at2g15690-like
Solyc01g107300.2.1	Phosphatase 2C family protein (AHRD V1 ***- D7MFT9_ARALY); contains Interpro domain(s) IPR015655 Protein phosphatase 2C	probable protein phosphatase 2c 63-like
Solyc01g109960.2.1	Ubiquitin-activating enzyme E1 3 (AHRD V1 **** B2VT99_PYRTR); contains Interpro domain(s) IPR009036 Molybdenum cofactor biosynthesis, MoeB	sumo-activating enzyme subunit 2-like
Solyc01g110540.2.1	Unknown Protein (AHRD V1)	PREDICTED: uncharacterized protein LOC101254139 isoform 1
Solyc01g111530.2.1	Ubiquitin-protein ligase 4 (AHRD V1 *-** D7M7X1_ARALY); contains Interpro domain(s) IPR000569 HECT	e3 ubiquitin-protein ligase upl3-like
Solyc01g109520.2.1	Ras-related protein Rab-7 (AHRD V1 ***- C1BJT6_OSMMO); contains Interpro domain(s) IPR002078 RNA polymerase sigma factor 54, interaction	ras-related protein rab7-like
Solyc01g107760.2.1	Cathepsin B-like cysteine proteinase (AHRD V1 **-* CYSP_SCHMA); contains Interpro domain(s) IPR013128 Peptidase C1A, papain	cysteine proteinase rd21a-like
Solyc01g107510.2.1	DNA polymerase IV (AHRD V1 **** C1GRH3_PARBA); contains Interpro domain(s) IPR012112 DNA repair protein, Rev1	dna repair protein rev1-like
Solyc01g110570.2.1	Auxin-induced SAUR-like protein (AHRD V1 **-- Q8S349_CAPAN); contains Interpro domain(s) IPR003676 Auxin responsive SAUR protein	saur family protein
Solyc01g111230.2.1	Disease resistance response like protein (AHRD V1 ***- Q9SZP7_ARATH); contains Interpro domain(s) IPR004265 Plant disease resistance response protein	disease resistance response protein 206-like
Solyc01g110990.2.1	ATP-dependent RNA helicase (AHRD V1 **** Q16PT8_AEDAE); contains Interpro domain(s) IPR011709 Region of unknown function DUF1605	probable pre-mrna-splicing factor atp-dependent rna helicase-like
Solyc01g109680.2.1	Unknown Protein (AHRD V1)	dipeptide transport atp-binding protein dppf
Solyc01g108140.2.1	B3 domain-containing protein At3g19184 (AHRD V1 ***- Y3918_ARATH); contains Interpro domain(s) IPR003340 Transcriptional factor B3	b3 domain-containing protein at3g19184-like
Solyc01g112350.2.1	Sec7 guanine nucleotide exchange factor (AHRD V1 *--* B0CY77_LACBS); contains Interpro domain(s) IPR000904 SEC7-like	brefeldin a-inhibited guanine nucleotide-exchange protein 1-like
Solyc01g108010.2.1	Limkain b1-like protein (AHRD V1 *--- Q66S24_OIKDI); contains Interpro domain(s) IPR007491 Protein of unknown function DUF537	endonuclease or glycosyl hydrolase
Solyc01g108800.2.1	3-hydroxyisobutyryl-CoA hydrolase (AHRD V1 **** D3NUG5_AZOS1); contains Interpro domain(s) IPR001753 Crotonase, core	3-hydroxyisobutyryl- hydrolase 1-like
Solyc01g108200.2.1	cDNA clone J013057C16 full insert sequence (AHRD V1 *-*- B7F5R8_ORYSJ)	protein disulfide-isomerase sco2-like isoform 2
Solyc01g111720.2.1	Translation initiation factor IF-3 (AHRD V1 *-*- D4YMH3_9MICO); contains Interpro domain(s) IPR001288 Translation initiation factor 3	translation initiation factor if-3-like
Solyc01g110120.2.1	V-type proton ATPase subunit a (AHRD V1 **** VPH1_NEUCR); contains Interpro domain(s) IPR002490 ATPase, V0/A0 complex, 116-kDa subunit	vacuolar proton atpase a3-like
Solyc01g111360.2.1	Peptidyl-prolyl cis-trans isomerase (AHRD V1 **** D7MDH2_ARALY); contains Interpro domain(s) IPR002130 Peptidyl-prolyl cis-trans isomerase, cyclophilin-type	peptidyl-prolyl cis-trans isomerase cyp19-4-like
Solyc01g111150.2.1	Translocon-associated protein alpha subunit (AHRD V1 ***- B6SRQ1_MAIZE); contains Interpro domain(s) IPR005595 Translocon-associated protein (TRAP), alpha subunit	translocon-associated protein subunit alpha-like
Solyc01g108130.2.1	B3 domain-containing protein At3g19184 (AHRD V1 *-*- Y3918_ARATH); contains Interpro domain(s) IPR003340 Transcriptional factor B3	b3 domain-containing protein os01g0234100-like
Solyc01g108660.2.1	N-acetyl-gamma-glutamyl-phosphate reductase (AHRD V1 ***- A7WPL0_TOBAC); contains Interpro domain(s) IPR000706 N-acetyl-gamma-glutamyl-phosphate reductase	probable n-acetyl-gamma-glutamyl-phosphate chloroplastic-like
Solyc01g107630.2.1	Cell division cycle protein 123-like protein (AHRD V1 ***- B6S349_9BILA); contains Interpro domain(s) IPR009772 D123	cell division cycle protein 123 homolog
Solyc01g107880.2.1	Membrane-associated ring finger 6 (AHRD V1 *--- B3VKM1_PIG); contains Interpro domain(s) IPR011016 Zinc finger, RING-CH-type	e3 ubiquitin-protein ligase march6-like
Solyc01g111790.1.1	Serine/threonine-protein phosphatase 2A regulatory subunit delta 1 isoform (AHRD V1 ***- Q0CAR1_ASPTN); contains Interpro domain(s) IPR002554 Protein phosphatase 2A, regulatory B subunit, B56	serine threonine protein phosphatase 2a 57 kda regulatory subunit b beta isoform-like
Solyc01g112020.2.1	Pentatricopeptide repeat-containing protein (AHRD V1 *-*- D7MUM4_ARALY); contains Interpro domain(s) IPR002885 Pentatricopeptide repeat	pentatricopeptide repeat-containing protein mitochondrial-like
Solyc01g108040.1.1	Dynamin-related protein 3B (AHRD V1 ***- DRP3B_ARATH); contains Interpro domain(s) IPR000375 Dynamin central region	dynamin-related protein 3a-like
Solyc01g109220.2.1	Mitochondrial import receptor subunit TOM6 homolog (AHRD V1 ***- TOM6_ARATH)	mitochondrial import receptor subunit tom6 homolog
Solyc01g110470.2.1	GAGA-binding transcriptional activator (AHRD V1 ***- A1E2T9_MEDTR); contains Interpro domain(s) IPR010409 GAGA binding-like	protein basic pentacysteine4-like
Solyc01g108890.2.1	Potential GTPase activation protein (AHRD V1 *-*- A8INH1_CHLRE)	bat2 domain-containing protein 1
Solyc01g107930.2.1	RING-finger protein like (AHRD V1 *-*- B6SVN2_MAIZE); contains Interpro domain(s) IPR018957 Zinc finger, C3HC4 RING-type	binding isoform 1
Solyc01g111780.2.1	Importin beta-2 subunit (AHRD V1 **-- C5JY88_AJEDS); contains Interpro domain(s) IPR011989 Armadillo-like helical	transportin-1-like
Solyc01g109110.2.1	Guanine nucleotide-binding protein alpha-1 subunit (AHRD V1 *-*- B6TWS6_MAIZE); contains Interpro domain(s) IPR001019 Guanine nucleotide binding protein (G-protein), alpha subunit	gtp-binding protein alpha
Solyc01g110410.2.1	Ubiquitin fusion-degradation protein-like (AHRD V1 ***- Q307X2_SOLTU); contains Interpro domain(s) IPR004854 Ubiquitin fusion degradation protein UFD1	ubiquitin fusion degradation protein 1 homolog
Solyc01g111160.2.1	Unknown Protein (AHRD V1)	---NA---
Solyc01g107470.2.1	Unknown Protein (AHRD V1)	lyr motif-containing protein at3g19508-like
Solyc01g111460.2.1	Proteasome subunit alpha type (AHRD V1 ***- Q38HT8_SOLTU); contains Interpro domain(s) IPR001353 Proteasome, subunit alpha/beta	proteasome subunit alpha type-7-like
Solyc01g109280.2.1	Ariadne-like ubiquitin ligase (AHRD V1 **-* D3AZ84_POLPA); contains Interpro domain(s) IPR002867 Zinc finger, C6HC-type	probable e3 ubiquitin-protein ligase ari1-like
Solyc01g107290.2.1	RING-H2 finger protein (AHRD V1 ***- Q8LJR8_SOYBN); contains Interpro domain(s) IPR001841 Zinc finger, RING-type	ring u-box superfamily isoform 1
Solyc01g107940.2.1	RING-finger protein like (AHRD V1 *-*- B6SVN2_MAIZE); contains Interpro domain(s) IPR018957 Zinc finger, C3HC4 RING-type	binding isoform 1
Solyc01g107610.2.1	PRKR interacting protein 1 (AHRD V1 *-*- B6TNU4_MAIZE); contains Interpro domain(s) IPR009548 Protein of unknown function DUF1168	prkr-interacting protein 1-like
Solyc01g112090.2.1	MATE efflux family protein expressed (AHRD V1 **-- Q2QYU0_ORYSJ); contains Interpro domain(s) IPR002528 Multi antimicrobial extrusion protein MatE	mate efflux family protein chloroplastic-like
Solyc01g111480.1.1	Mutator-like transposase (AHRD V1 *--- Q94HK4_ORYSA); contains Interpro domain(s) IPR004332 Transposase, MuDR, plant	PREDICTED: uncharacterized protein LOC101259794
Solyc01g109130.2.1	Proteasome assembly chaperone 2 (AHRD V1 ***- C1BZ15_ESOLU); contains Interpro domain(s) IPR016562 20S proteasome assembly chaperone 2, subgroup	proteasome assembly chaperone 2-like
Solyc01g112150.2.1	Sec1-1 syntaxin binding protein (AHRD V1 *--* Q3SEL6_PARTE); contains Interpro domain(s) IPR001619 Sec1-like protein	sec1 family transport protein sly1-like
Solyc01g112320.2.1	Protein FAR1-RELATED SEQUENCE 5 (AHRD V1 ***- FRS5_ARATH); contains Interpro domain(s) IPR004330 Transcription factor, FAR1-related	protein far1-related sequence 5-like
Solyc01g109710.2.1	Universal stress protein (AHRD V1 **-- B6SNQ1_MAIZE); contains Interpro domain(s) IPR006016 UspA	adenine nucleotide alpha hydrolases-like superfamily protein isoform 1
Solyc01g107500.2.1	Unknown Protein (AHRD V1)	dna repair protein rev1-like
Solyc01g109640.2.1	AP-3 complex subunit sigma-2 (AHRD V1 ***- B4FA26_MAIZE); contains Interpro domain(s) IPR016635 Adaptor protein complex, sigma subunit	ap-3 complex subunit sigma-like
Solyc01g109940.2.1	26S protease regulatory subunit (AHRD V1 ***- C0NAB1_AJECG); contains Interpro domain(s) IPR005937 26S proteasome subunit P45	26s protease regulatory subunit s10b homolog b-like
Solyc01g111440.2.1	Senescence-associated protein 12 (AHRD V1 *-*- O81657_HEMSP); contains Interpro domain(s) IPR009686 Senescence-associated	senescence-related protein
Solyc01g112260.2.1	Unknown Protein (AHRD V1)	PREDICTED: uncharacterized protein LOC101258903
Solyc01g109490.2.1	Unknown Protein (AHRD V1)	---NA---
Solyc01g109760.2.1	Nodulin family protein (AHRD V1 ***- D7MWD3_ARALY); contains Interpro domain(s) IPR010658 Nodulin-like	uncharacterized membrane protein ymr155w-like
Solyc01g110960.2.1	Glutamic acid-rich protein (AHRD V1 ***- Q570K7_ARATH)	leucine-rich repeat-containing protein ddb_g0290503-like
Solyc01g108210.2.1	Cytochrome P450	abscisic acid 8 -hydroxylase 4-like
Solyc01g108240.2.1	Ethylene responsive transcription factor 2b (AHRD V1 *-*- C0J9I6_9ROSA); contains Interpro domain(s) IPR001471 Pathogenesis-related transcriptional factor and ERF, DNA-binding	ethylene-responsive transcription factor erf109-like
Solyc01g111590.2.1	Histone-binding protein RBBP7 (AHRD V1 **-* B5X3G4_SALSA); contains Interpro domain(s) IPR020472 G-protein beta WD-40 repeat, region	wd-40 repeat-containing protein msi2-like
Solyc01g111760.2.1	V-type ATP synthase beta chain (AHRD V1 ***- VATB_PYRHO); contains Interpro domain(s) IPR005723 ATPase, V1 complex, subunit B	v-type proton atpase subunit b2-like
Solyc01g111470.2.1	Pentatricopeptide repeat-containing protein (AHRD V1 ***- D7L879_ARALY); contains Interpro domain(s) IPR002885 Pentatricopeptide repeat	pentatricopeptide repeat-containing protein at2g16880-like
Solyc01g111090.2.1	ER lumen protein retaining receptor family protein (AHRD V1 ***- D7LL09_ARALY); contains Interpro domain(s) IPR000133 ER lumen protein retaining receptor	er lumen protein retaining receptor-like
Solyc01g112290.2.1	Glutamyl-tRNA synthetase (AHRD V1 ***- Q52JJ5_NICBE); contains Interpro domain(s) IPR004527 Glutamyl-tRNA synthetase, class Ic, bacterial/mitochondrial	glutamate--trna chloroplastic mitochondrial-like
Solyc01g107550.2.1	Methylthioribose kinase (AHRD V1 **** Q6PMT1_ORYSJ); contains Interpro domain(s) IPR009212 Methylthioribose kinase	methylthioribose kinase-like
Solyc01g108220.2.1	Unknown Protein (AHRD V1)	---NA---
Solyc01g110490.2.1	tRNA-dihydrouridine synthase 3-like (AHRD V1 ***- B5X496_SALSA); contains Interpro domain(s) IPR001269 tRNA-dihydrouridine synthase	trna-dihydrouridine synthase
Solyc01g112300.2.1	Chloride channel E (AHRD V1 ***- D3YP04_THEHA); contains Interpro domain(s) IPR001807 Chloride channel, voltage gated	chloride channel protein clc-e-like
Solyc01g111710.2.1	26S proteasome non-ATPase regulatory subunit 3 (AHRD V1 ***- B6TBG8_MAIZE); contains Interpro domain(s) IPR013143 PCI/PINT associated module	probable 26s proteasome non-atpase regulatory subunit 3-like
Solyc01g108290.2.1	SWIB/MDM2 domain containing protein (AHRD V1 ***- B6SZA4_MAIZE); contains Interpro domain(s) IPR019835 SWIB domain	upstream activation factor subunit spp27-like
Solyc01g110750.2.1	Unknown Protein (AHRD V1)	dna mismatch repair protein mlh3-like isoform x4
Solyc01g112250.2.1	Calcium-dependent protein kinase 3 (AHRD V1 **** Q7Y050_CAPAN); contains Interpro domain(s) IPR002290 Serine/threonine protein kinase	calcium-dependent protein kinase 4-like
Solyc01g111770.2.1	Os11g0198100 protein (Fragment) (AHRD V1 *-*- Q0IU20_ORYSJ); contains Interpro domain(s) IPR006852 Protein of unknown function DUF616	PREDICTED: uncharacterized protein LOC101246191
Solyc01g112310.2.1	H(+)/Cl(-) exchange transporter ClcA (AHRD V1 *-*- C9PHM9_VIBFU); contains Interpro domain(s) IPR001807 Chloride channel, voltage gated	chloride channel protein clc-e-like
Solyc01g107420.2.1	TIP41-like protein (AHRD V1 *-*- TIPRL_XENTR); contains Interpro domain(s) IPR007303 TIP41-like protein	tip41-like partial
Solyc01g110400.2.1	Unknown Protein (AHRD V1)	30s ribosomal protein mitochondrial-like
Solyc01g107410.2.1	PHD-finger family homeodomain protein (Fragment) (AHRD V1 *--- Q8H990_ORYSJ); contains Interpro domain(s) IPR019787 Zinc finger, PHD-finger	pathogenesis-related homeodomain isoform x1
Solyc01g109890.2.1	Chaperone protein dnaJ 10 (AHRD V1 **** B6T7D7_MAIZE); contains Interpro domain(s) IPR003095 Heat shock protein DnaJ	chaperone protein dnaj 10-like
Solyc01g107150.2.1	Zinc finger protein-like 1 (AHRD V1 ***- B6TBU8_MAIZE)	zinc finger 1 homolog
Solyc01g109560.2.1	Guanine nucleotide-binding protein subunit beta (AHRD V1 ***- C1GED5_PARBD); contains Interpro domain(s) IPR016346 Guanine nucleotide-binding protein, beta subunit	guanine nucleotide-binding protein subunit beta-2-like
Solyc01g109450.2.1	Kinase PfkB family (AHRD V1 *-*- D7N8Y3_9FIRM); contains Interpro domain(s) IPR011611 Carbohydrate/purine kinase	pseudouridine kinase-like
Solyc01g109510.2.1	Subunit of the SWI/SNF chromatin remodeling complex (AHRD V1 *-*- C4QY27_PICPG); contains Interpro domain(s) IPR007526 SWIRM	swi snf complex subunit swi3d-like
Solyc01g111420.2.1	LOC734162 protein (Fragment) (AHRD V1 *-*- Q4KLD4_XENLA); contains Interpro domain(s) IPR002143 Ribosomal protein L1	ribosomal l1 domain-containing protein 1-like
Solyc01g111620.2.1	AT4G35080-like protein (Fragment) (AHRD V1 *--- D6PRD4_9BRAS); contains Interpro domain(s) IPR011541 Nickel/cobalt transporter, high-affinity	urease accessory
Solyc01g108900.2.1	LRR receptor-like serine/threonine-protein kinase, RLP	pollen-specific leucine-rich repeat extensin-like protein 3-like
Solyc01g107350.2.1	Os12g0581300 protein (Fragment) (AHRD V1 *-*- Q0IMB2_ORYSJ); contains Interpro domain(s) IPR006873 Protein of unknown function DUF620	soluble secretory phospholipase a2 receptor
Solyc01g107580.2.1	Pseudouridine synthase family protein (AHRD V1 ***- D7L9Z2_ARALY); contains Interpro domain(s) IPR006145 Pseudouridine synthase, RsuA and RluB/C/D/E/F	rna pseudourine synthase mitochondrial-like
Solyc01g111320.2.1	Thaumatin-like protein (AHRD V1 **-- Q9ZQY9_ARATH); contains Interpro domain(s) IPR001938 Thaumatin, pathogenesis-related	thaumatin-like protein 1-like
Solyc01g110300.2.1	Clathrin binding protein (AHRD V1 **-* B6STF7_MAIZE); contains Interpro domain(s) IPR001452 Src homology-3 domain	sh3 domain-containing protein
Solyc01g109530.2.1	Receptor like kinase, RLK	proline-rich receptor-like protein kinase perk4-like
Solyc01g112130.2.1	Dimethylaniline monooxygenase 5 (AHRD V1 ***- B5X0U9_SALSA); contains Interpro domain(s) IPR000960 Flavin-containing monooxygenase FMO	probable flavin-containing monooxygenase 1-like
Solyc01g108260.2.1	TPbinding protein (AHRD V1 **-* B8Y649_PIG); contains Interpro domain(s) IPR013926 Kinase binding protein CGI-121	tp53rk-binding protein
Solyc01g111670.2.1	Unknown Protein (AHRD V1); contains Interpro domain(s) IPR009688 Protein of unknown function DUF1279	PREDICTED: uncharacterized protein LOC101243648
Solyc01g111520.2.1	Synaptotagmin (AHRD V1 *--- B0W3L1_CULQU); contains Interpro domain(s) IPR018029 C2 membrane targeting protein	extended synaptotagmin-2 isoform 1
Solyc01g109540.2.1	Coatomer subunit gamma (AHRD V1 ***- B6SV32_MAIZE); contains Interpro domain(s) IPR017106 Coatomer, gamma subunit	coatomer subunit gamma-like
Solyc01g110480.2.1	BZIP transcription factor family protein expressed (AHRD V1 *-*- Q8LN44_ORYSJ); contains Interpro domain(s) IPR011616 bZIP transcription factor, bZIP-1	transcription factor rf2a-like
Solyc01g111930.2.1	Rop guanine nucleotide exchange factor 1 (AHRD V1 **-* ROGF1_ARATH); contains Interpro domain(s) IPR005512 Rop nucleotide exchanger, PRONE	rop guanine nucleotide exchange factor 1-like
Solyc01g107600.2.1	Unc-50 homolog (AHRD V1 ***- C1BXJ0_ESOLU); contains Interpro domain(s) IPR007881 UNC-50	protein unc-50 homolog
Solyc01g109350.2.1	WD-40 repeat-containing protein (AHRD V1 **-- D2VK35_NAEGR); contains Interpro domain(s) IPR013535 PUL	phospholipase a-2-activating
Solyc01g108690.1.1	Unknown Protein (AHRD V1)	hypothetical protein MOQ_009118, partial
Solyc01g109260.2.1	At2g16070/F7H1.9 (AHRD V1 ***- Q93ZL0_ARATH)	plastid division protein pdv2-like
Solyc01g109150.2.1	cytochrome P450	9-divinyl ether synthase-like
Solyc01g109290.2.1	Methyltransferase (AHRD V1 **** D0N411_PHYIN); contains Interpro domain(s) IPR013216 Methyltransferase type 11	endothelin-converting enzyme 2-like
Solyc01g109950.2.1	Pto-like, Serine/threonine kinase protein, resistance protein	probable receptor-like protein kinase at4g39110-like
Solyc01g109060.2.1	Pentatricopeptide repeat-containing protein (AHRD V1 ***- D7L4E9_ARALY); contains Interpro domain(s) IPR002885 Pentatricopeptide repeat	pentatricopeptide repeat-containing protein mitochondrial-like
Solyc01g107450.2.1	Unknown Protein (AHRD V1)	PREDICTED: uncharacterized protein LOC102598144 isoform X2
Solyc01g112220.2.1	Serine/threonine protein kinase-like (AHRD V1 **** Q5XWQ1_SOLTU); contains Interpro domain(s) IPR002290 Serine/threonine protein kinase	probable serine threonine-protein kinase chloroplastic-like
Solyc01g110770.2.1	Auxin-induced SAUR-like protein (AHRD V1 *-*- Q8S351_CAPAN); contains Interpro domain(s) IPR003676 Auxin responsive SAUR protein	auxin-induced protein 15a-like
Solyc01g109400.2.1	Flavoprotein wrbA (AHRD V1 ***- B6SPB2_MAIZE); contains Interpro domain(s) IPR010089 Flavoprotein WrbA	minor allergen alt a 7-like
Solyc01g108160.2.1	Autophagy-related protein 2 (AHRD V1 *-*- C1GCV2_PARBD); contains Interpro domain(s) IPR015412 ATG2, C-terminal	autophagy isoform 1
Solyc01g109650.2.1	Receptor like kinase, RLK	probable lrr receptor-like serine threonine-protein kinase at2g16250-like
Solyc01g110700.2.1	Unknown Protein (AHRD V1)	dna mismatch repair protein mlh3-like isoform x8
Solyc01g108420.2.1	Unknown Protein (AHRD V1)	sensor kinase
Solyc01g112120.2.1	Dimethylaniline monooxygenase 5 (AHRD V1 **** B5X0U9_SALSA)	probable flavin-containing monooxygenase 1-like
Solyc01g110910.2.1	Unknown Protein (AHRD V1)	indole-3-acetic acid-induced protein arg7-like
Solyc01g107440.2.1	Unknown Protein (AHRD V1)	---NA---
Solyc01g112160.2.1	Phosphoglycerate mutase family protein (AHRD V1 ***- B6UI41_MAIZE); contains Interpro domain(s) IPR013078 Phosphoglycerate mutase	phosphoglycerate mutase family protein
Solyc01g108680.2.1	Hydrolase alpha/beta fold family protein (AHRD V1 **-- D7LG04_ARALY); contains Interpro domain(s) IPR000073 Alpha/beta hydrolase fold-1	polyneuridine-aldehyde esterase-like
Solyc01g111060.2.1	5&apos-methylthioadenosine/S-adenosylhomocysteine nucleosidase (AHRD V1 **** D4FIY6_STAEP); contains Interpro domain(s) IPR018017 Nucleoside phosphorylase, family 1	5 -methylthioadenosine s-adenosylhomocysteine nucleosidase 1-like
Solyc01g110680.2.1	Auxin-induced SAUR-like protein (AHRD V1 ***- Q8S351_CAPAN); contains Interpro domain(s) IPR003676 Auxin responsive SAUR protein	auxin-induced protein 15a-like
Solyc01g108790.1.1	3-hydroxyisobutyryl-CoA hydrolase-like protein 2, mitochondrial (AHRD V1 ***- HIBC5_ARATH)	3-hydroxyisobutyryl- hydrolase 1-like
Solyc01g107990.2.1	MAPprotein kinase-like protein (AHRD V1 **-- Q9LT86_ARATH); contains Interpro domain(s) IPR017946 PLC-like phosphodiesterase, TIM beta/alpha-barrel domain	pi-plc x domain-containing protein at5g67130-like
Solyc01g108620.2.1	Os11g0614900 protein (Fragment) (AHRD V1 *-*- Q0IRN0_ORYSJ); contains Interpro domain(s) IPR008547 Protein of unknown function DUF829, transmembrane 53	peptide methionine sulfoxide reductase msra
Solyc01g107400.2.1	Indole-3-acetic acid-amido synthetase GH3.8 (AHRD V1 ***- B6U4E2_MAIZE)	probable indole-3-acetic acid-amido synthetase -like
Solyc01g107590.2.1	Cinnamyl alcohol dehydrogenase (AHRD V1 **** C1IC55_GOSHI); contains Interpro domain(s) IPR002085 Alcohol dehydrogenase superfamily, zinc-containing	cinnamyl alcohol dehydrogenase
Solyc01g111120.2.1	Triosephosphate isomerase (AHRD V1 **** D6N3G7_GOSHI); contains Interpro domain(s) IPR000652 Triosephosphate isomerase	triosephosphate chloroplastic-like
Solyc01g109850.2.1	Diaminopimelate decarboxylase (AHRD V1 **** D2DKE7_SOYBN); contains Interpro domain(s) IPR002986 Diaminopimelate decarboxylase	diaminopimelate decarboxylase chloroplastic-like
Solyc01g108540.2.1	Acetyl esterase (AHRD V1 *--- AES_SHIFL); contains Interpro domain(s) IPR013094 Alpha/beta hydrolase fold-3	probable carboxylesterase 7-like
Solyc01g112100.2.1	Dimethylaniline monooxygenase 5 (AHRD V1 **** B5X0U9_SALSA); contains Interpro domain(s) IPR012143 Dimethylaniline monooxygenase, N-oxide-forming	probable flavin-containing monooxygenase 1-like
Solyc01g108430.2.1	WW domain-binding protein 4 (AHRD V1 *-*- C1C256_9MAXI); contains Interpro domain(s) IPR013085 Zinc finger, U1-C type	ww domain-binding protein 4-like
Solyc01g111200.2.1	Eukaryotic translation initiation factor 4B (AHRD V1 **** Q9AUJ7_WHEAT); contains Interpro domain(s) IPR010433 Plant specific eukaryotic initiation factor 4B	translation initiation factor
Solyc01g110790.2.1	Auxin-induced SAUR-like protein (AHRD V1 ***- Q8S351_CAPAN); contains Interpro domain(s) IPR003676 Auxin responsive SAUR protein	auxin-induced protein 15a-like
Solyc01g109920.2.1	Dehydrin (AHRD V1 *-*- Q6YL18_BRAJU); contains Interpro domain(s) IPR000167 Dehydrin	late embryogenesis abundant
Solyc01g109660.2.1	Glycine-rich RNA-binding protein (AHRD V1 *-** B2YKT9_TOBAC); contains Interpro domain(s) IPR015465 RNA recognition motif, glycine rich protein	glycine-rich rna-binding protein
Solyc01g109190.1.1	Unknown Protein (AHRD V1)	---NA---
Solyc01g110660.2.1	Auxin-induced SAUR-like protein (AHRD V1 ***- Q8S351_CAPAN); contains Interpro domain(s) IPR003676 Auxin responsive SAUR protein	auxin-induced protein 15a-like
Solyc01g109840.2.1	Diaminopimelate decarboxylase 2, chloroplastic (AHRD V1 ***- DCDA2_ARATH)	---NA---
Solyc01g109370.2.1	1-acylglycerol-3-phosphate acyltransferase (AHRD V1 **** A2TF19_BRAJU); contains Interpro domain(s) IPR002123 Phospholipid/glycerol acyltransferase	probable 1-acyl-sn-glycerol-3-phosphate acyltransferase 5-like
Solyc01g109930.2.1	Inositol monophosphatase family protein (AHRD V1 **** D7MGB6_ARALY); contains Interpro domain(s) IPR011809 Histidinol-phosphate phosphatase, putative, inositol monophosphatase	bifunctional phosphatase chloroplastic-like
Solyc01g110710.2.1	Auxin-induced SAUR-like protein (AHRD V1 ***- Q8S351_CAPAN); contains Interpro domain(s) IPR003676 Auxin responsive SAUR protein	auxin-induced protein 15a-like
Solyc01g112050.2.1	Bzip transcription factor-like (AHRD V1 *-*- Q8RU34_ORYSJ); contains Interpro domain(s) IPR006867 Protein of unknown function DUF632	PREDICTED: uncharacterized protein LOC101257515
Solyc01g110530.2.1	Peptidyl-prolyl cis-trans isomerase C (AHRD V1 *--* PPIC_ECOLI); contains Interpro domain(s) IPR000297 Peptidyl-prolyl cis-trans isomerase, PpiC-type	peptidyl-prolyl cis-trans isomerase pin1-like
Solyc01g110720.2.1	Auxin-induced SAUR-like protein (AHRD V1 ***- Q8S351_CAPAN); contains Interpro domain(s) IPR003676 Auxin responsive SAUR protein	auxin-induced protein 15a-like
Solyc01g112280.2.1	Succinyl-diaminopimelate desuccinylase (AHRD V1 **-- DAPE_MAGSA); contains Interpro domain(s) IPR010159 N-acyl-L-amino-acid amidohydrolase	aminoacylase family protein
Solyc01g107870.2.1	Poly(A) RNA binding protein (AHRD V1 **** B2CJ74_9HYPO); contains Interpro domain(s) IPR006515 Polyadenylate binding protein, human types 1, 2, 3, 4	polyadenylate-binding protein 2-like
Solyc01g111510.2.1	Ascorbate peroxidase (AHRD V1 **** Q8W4V7_CAPAN); contains Interpro domain(s) IPR002207 Plant ascorbate peroxidase	ascorbate peroxidase
Solyc01g110590.2.1	Auxin-induced SAUR-like protein (AHRD V1 ***- Q8S349_CAPAN); contains Interpro domain(s) IPR003676 Auxin responsive SAUR protein	indole-3-acetic acid-induced protein arg7-like
Solyc01g107900.2.1	Acyltransferase WS/DGAT/MGAT family protein (AHRD V1 **-- A7NLM3_ROSCS); contains Interpro domain(s) IPR009721 Protein of unknown function DUF1298	o-acyltransferase wsd1-like
Solyc01g110560.2.1	Auxin responsive SAUR protein (AHRD V1 *-*- Q1SN26_MEDTR); contains Interpro domain(s) IPR003676 Auxin responsive SAUR protein	auxin-induced protein 6b-like
Solyc01g107320.2.1	Pentatricopeptide repeat-containing protein (AHRD V1 ***- D7M7W8_ARALY); contains Interpro domain(s) IPR002885 Pentatricopeptide repeat	pentatricopeptide repeat-containing protein at5g02860-like
Solyc01g111400.2.1	Subtilisin-like protease (AHRD V1 **-- A9XG40_TOBAC); contains Interpro domain(s) IPR015500 Peptidase S8, subtilisin-related	subtilisin-like protease-like
Solyc01g108650.2.1	Unknown Protein (AHRD V1)	embryo defective isoform 1
Solyc01g113620.1.1	NBS-LRR resistance protein (Fragment) (AHRD V1 *-*- C1K2I0_ROSHC); contains Interpro domain(s) IPR002182 NB-ARC	tmv resistance protein n-like
Solyc01g111020.2.1	Pentatricopeptide repeat-containing protein (AHRD V1 *-*- D7L4E9_ARALY); contains Interpro domain(s) IPR002885 Pentatricopeptide repeat	pentatricopeptide repeat-containing protein chloroplastic-like
Solyc01g111000.2.1	Auxin-induced SAUR-like protein (AHRD V1 ***- Q8S351_CAPAN); contains Interpro domain(s) IPR003676 Auxin responsive SAUR protein	auxin-induced protein 15a-like
Solyc01g108390.2.1	Proteinase inhibitor (AHRD V1 ***- D6BR63_9ROSI); contains Interpro domain(s) IPR000864 Proteinase inhibitor I13, potato inhibitor I	glu protease inhibitor-like
Solyc01g107380.2.1	Seed maturation protein PM23 (Fragment) (AHRD V1 ***- Q9SEL1_SOYBN)	mar-binding filament-like protein 1 isoform 1
Solyc01g110670.2.1	Auxin-induced SAUR-like protein (AHRD V1 ***- Q8S351_CAPAN); contains Interpro domain(s) IPR003676 Auxin responsive SAUR protein	auxin-induced protein 15a-like
Solyc01g111170.2.1	Peptidyl-prolyl cis-trans isomerase (AHRD V1 ***- Q9XF12_SOLTU); contains Interpro domain(s) IPR002130 Peptidyl-prolyl cis-trans isomerase, cyclophilin-type	cyclophilin
Solyc01g109630.2.1	mTERF domain-containing protein 3, mitochondrial (AHRD V1 *--- MTER3_HUMAN); contains Interpro domain(s) IPR003690 Mitochodrial transcription termination factor-related	uncharacterized loc101220316
Solyc01g108190.2.1	Calmodulin-like protein (AHRD V1 ***- Q67TZ4_ORYSJ); contains Interpro domain(s) IPR011992 EF-Hand type	calmodulin-like protein 1-like
Solyc01g107800.2.1	Expressed protein (Fragment) (AHRD V1 *-*- B3VV16_POPTN); contains Interpro domain(s) IPR006514 Protein of unknown function DUF579, plant	protein irx15-like
Solyc01g107850.2.1	UDP-glucosyltransferase HvUGT5876 (AHRD V1 ***- D3WYW1_HORVD); contains Interpro domain(s) IPR002213 UDP-glucuronosyl/UDP-glucosyltransferase	anthocyanin 3 -o-beta-glucosyltransferase
Solyc01g110270.2.1	Crs1/yhby domain containing protein (Fragment) (AHRD V1 *-*- A6N061_ORYSI); contains Interpro domain(s) IPR001890 RNA-binding, CRM domain	rna-binding crs1 domain
Solyc01g108280.2.1	Serine/threonine protein kinase (AHRD V1 **** Q0PL87_CAMSI); contains Interpro domain(s) IPR015740 Plant protein serine/threonine kinase-like	serine threonine-protein kinase srk2e-like
Solyc01g109910.2.1	AT2G21500 protein (Fragment) (AHRD V1 **-- B9DHX0_ARATH); contains Interpro domain(s) IPR001841 Zinc finger, RING-type	uncharacterized serine-rich
Solyc01g110520.2.1	Glucosamine--fructose-6-phosphate aminotransferase (AHRD V1 *-*- GLMS_METKA); contains Interpro domain(s) IPR005854 Amidophosphoribosyl transferase	amidophosphoribosyltransferase chloroplastic-like
Solyc01g110800.2.1	Auxin-induced SAUR-like protein (AHRD V1 ***- Q8S351_CAPAN); contains Interpro domain(s) IPR003676 Auxin responsive SAUR protein	auxin-induced protein 15a-like
Solyc01g108610.2.1	Cyclin-dependent kinase inhibitor 12 (AHRD V1 ***- Q6T2Z2_SOYBN); contains Interpro domain(s) IPR016701 Cyclin-dependent kinase inhibitor, plant	cyclin-dependent kinase inhibitor 7-like
Solyc01g109420.2.1	Flavoprotein wrbA (AHRD V1 ***- B6SPB2_MAIZE); contains Interpro domain(s) IPR010089 Flavoprotein WrbA	minor allergen alt a 7-like
Solyc01g110920.2.1	Auxin-induced SAUR-like protein (AHRD V1 ***- Q8S351_CAPAN); contains Interpro domain(s) IPR003676 Auxin responsive SAUR protein	auxin-induced protein 15a-like
Solyc01g107910.2.1	Caffeoyl CoA 3-O-methyltransferase (AHRD V1 **** Q5I2D1_9ROSI); contains Interpro domain(s) IPR002935 O-methyltransferase, family 3	caffeoyl- o-methyltransferase
Solyc01g111280.2.1	Cold shock protein-1 (AHRD V1 *-*- Q8LPA7_WHEAT); contains Interpro domain(s) IPR002059 Cold-shock protein, DNA-binding	glycine-rich protein 2-like
Solyc01g108500.2.1	Polyadenylate-binding protein (AHRD V1 **-* PABP_DROME); contains Interpro domain(s) IPR012677 Nucleotide-binding, alpha-beta plait	polyadenylate-binding protein rbp47-like
Solyc01g109410.2.1	Dolichyl-diphosphooligosaccharide--protein glycosyltransferase subunit (AHRD V1 ***- C1C2G2_9MAXI); contains Interpro domain(s) IPR005013 Dolichyl-diphosphooligosaccharide-protein glycosyltransferase 48kDa subunit	dolichyl-diphosphooligosaccharide--protein glycosyltransferase 48 kda subunit-like
Solyc01g108440.2.1	Calmodulin-binding protein (AHRD V1 **-* D7L4F9_ARALY); contains Interpro domain(s) IPR012442 Protein of unknown function DUF1645	calmodulin-binding family protein
Solyc01g111310.2.1	Transmembrane amino acid transporter protein (AHRD V1 **** A8NP23_BRUMA); contains Interpro domain(s) IPR013057 Amino acid transporter, transmembrane	auxin transporter-like protein 5-like
Solyc01g109030.2.1	B3 domain-containing protein REM5 (AHRD V1 *-*- REM5_ARATH)	b3 domain-containing protein at5g60140-like
Solyc01g108070.2.1	4-methyl-5(B-hydroxyethyl)-thiazole monophosphate biosynthesis enzyme (AHRD V1 *-*- C5BNJ2_TERTT); contains Interpro domain(s) IPR006287 DJ-1	protein dj-1 homolog c-like
Solyc01g110160.2.1	Chromosome 11 contig 1 DNA sequence (AHRD V1 ***- Q00YQ5_OSTTA)	PREDICTED: uncharacterized protein LOC101251520
Solyc01g107890.2.1	Filament-like plant protein (Fragment) (AHRD V1 *-*- FPP_SOLLC); contains Interpro domain(s) IPR008587 Protein of unknown function DUF869, plant	filament-like plant protein 7-like
Solyc01g110100.2.1	Zinc finger family protein (AHRD V1 **-- D7LUL3_ARALY); contains Interpro domain(s) IPR002867 Zinc finger, C6HC-type	probable e3 ubiquitin-protein ligase rnf217-like
Solyc01g111660.2.1	Aquaporin-like protein (AHRD V1 ***- Q8W1A8_PETHY); contains Interpro domain(s) IPR012269 Aquaporin	aquaporin pip2-7-like
Solyc01g110450.2.1	NADP dependent sorbitol 6-phosphate dehydrogenase (Fragment) (AHRD V1 **-- Q8S4S2_VAUCA); contains Interpro domain(s) IPR020471 Aldo/keto reductase subgroup	nadp-dependent d-sorbitol-6-phosphate dehydrogenase-like
Solyc01g108510.2.1	Nodulation protein H (AHRD V1 ***- NOH4_RHIME)	nodulation protein h-like
Solyc01g111110.2.1	Unknown Protein (AHRD V1)	PREDICTED: uncharacterized protein LOC101250258
Solyc01g108840.2.1	Receptor like kinase, RLK	probable receptor protein kinase tmk1-like
Solyc01g108780.2.1	Alpha-hydroxynitrile lyase (AHRD V1 **-- O49897_MANES); contains Interpro domain(s) IPR000073 Alpha/beta hydrolase fold-1	polyneuridine-aldehyde esterase-like
Solyc01g110430.2.1	Unknown Protein (AHRD V1)	---NA---
Solyc01g108770.1.1	Unknown Protein (AHRD V1)	polyneuridine-aldehyde esterase-like
Solyc01g110130.2.1	DNA replication licensing factor (AHRD V1 ***- Q2TZM7_ASPOR); contains Interpro domain(s) IPR008047 MCM protein 4	dna replication licensing factor mcm4-like
Solyc01g107670.2.1	LRR receptor-like serine/threonine-protein kinase, RLP	disease resistance protein
Solyc01g109230.2.1	CHP-rich zinc finger protein-like (AHRD V1 **-- Q6YTW3_ORYSJ); contains Interpro domain(s) IPR011424 C1-like	cysteine histidine-rich c1 domain family protein
Solyc01g111130.2.1	Transcription factor (Fragment) (AHRD V1 *--* D6MK24_9ASPA); contains Interpro domain(s) IPR011598 Helix-loop-helix DNA-binding	transcription factor bhlh121-like
Solyc01g109670.2.1	MYB transcription factor (AHRD V1 *-*- Q9SIJ5_ARATH); contains Interpro domain(s) IPR015609 Molecular chaperone, heat shock protein, Hsp40, DnaJ	subfamily c member 2
Solyc01g111560.2.1	Ras-like GTP-binding protein RHO (AHRD V1 **-- RHO_APLCA); contains Interpro domain(s) IPR003578 Ras small GTPase, Rho type	rac-like gtp-binding protein rac1-like
Solyc01g108170.2.1	Unknown Protein (AHRD V1)	PREDICTED: uncharacterized protein LOC101265871
Solyc01g109610.2.1	2-hydroxyacid dehydrongenase (Fragment) (AHRD V1 *-*- C6F725_PSEMZ)	erythronate-4-phosphate dehydrogenase family protein isoform 1
Solyc01g107680.2.1	ATP-dependent Clp protease ATP-binding subunit ClpX (AHRD V1 ***- D1ASM6_ANACI); contains Interpro domain(s) IPR004487 ClpX, ATPase regulatory subunit	atp-dependent clp protease atp-binding subunit -like
Solyc01g110060.2.1	Purple acid phosphatase (AHRD V1 **** Q84KZ2_TOBAC); contains Interpro domain(s) IPR015914 Purple acid phosphatase, N-terminal	purple acid phosphatase
Solyc01g111980.2.1	Lysine/histidine transporter (AHRD V1 **** B9HR02_POPTR); contains Interpro domain(s) IPR013057 Amino acid transporter, transmembrane	lysine histidine transporter-like 8-like
Solyc01g110110.2.1	Cysteine proteinase cathepsin F (AHRD V1 **-* D3TN89_GLOMM); contains Interpro domain(s) IPR013128 Peptidase C1A, papain	cysteine proteinase rd19a-like
Solyc01g110630.2.1	Auxin-induced SAUR-like protein (AHRD V1 ***- Q8S351_CAPAN); contains Interpro domain(s) IPR003676 Auxin responsive SAUR protein	auxin-induced protein 15a-like
Solyc01g112080.2.1	LysM-domain GPI-anchored protein (AHRD V1 **-- Q4VVD8_ORYSJ); contains Interpro domain(s) IPR002482 Peptidoglycan-binding Lysin subgroup	lysm domain-containing gpi-anchored protein 2-like
Solyc01g110190.2.1	Kinesin like protein (AHRD V1 ***- Q9SVI8_ARATH); contains Interpro domain(s) IPR001752 Kinesin, motor region	centromere-associated protein e-like isoform x2
Solyc01g111380.2.1	Actin depolymerizing factor 5 (AHRD V1 **** A1XJ48_GOSHI); contains Interpro domain(s) IPR002108 Actin-binding, cofilin/tropomyosin type	actin-depolymerizing factor 5-like
Solyc01g109770.2.1	RER1 protein (AHRD V1 ***- Q9P0H9_HUMAN); contains Interpro domain(s) IPR004932 Retrieval of early ER protein Rer1	protein rer1b-like
Solyc01g111600.2.1	Metal ion binding protein (AHRD V1 **-* D7MN12_ARALY); contains Interpro domain(s) IPR006121 Heavy metal transport/detoxification protein	heavy metal-associated isoprenylated plant protein 26-like
Solyc01g110310.2.1	GATA transcription factor 9 (AHRD V1 *-*- B6STZ1_MAIZE); contains Interpro domain(s) IPR016679 Transcription factor, GATA, plant	gata transcription factor 5-like
Solyc01g108600.2.1	Presequence protease, mitochondrial (AHRD V1 **-- PREP_DANRE); contains Interpro domain(s) IPR013578 Peptidase M16C associated	presequence protease chloroplastic mitochondrial-like
Solyc01g111750.2.1	Heat shock protein DnaJ domain protein (AHRD V1 *--- B7K9K5_CYAP7)	PREDICTED: uncharacterized protein LOC101245406
Solyc01g107330.2.1	SWIB/MDM2 domain protein (AHRD V1 ***- D6VG39_9BURK); contains Interpro domain(s) IPR019835 SWIB domain	protein tri1-like
Solyc01g107190.2.1	LOB domain protein 38 (AHRD V1 *-*- D7LT02_ARALY); contains Interpro domain(s) IPR004883 Lateral organ boundaries, LOB	lob domain-containing protein 37-like
Solyc01g111570.2.1	Receptor-like kinase (AHRD V1 *-*- A7VM42_MARPO); contains Interpro domain(s) IPR002290 Serine/threonine protein kinase	probable receptor-like serine threonine-protein kinase at5g57670-like
Solyc01g110440.2.1	Arginine decarboxylase (AHRD V1 **** Q9SCF0_DATST); contains Interpro domain(s) IPR002985 Arginine decarboxylase	arginine decarboxylase
Solyc01g109570.2.1	Glucan endo-1 3-beta-glucosidase 7 (AHRD V1 ***- B6T289_MAIZE); contains Interpro domain(s) IPR013781 Glycoside hydrolase, subgroup, catalytic core IPR000490 Glycoside hydrolase, family 17	glucan endo- -beta-glucosidase 7-like
Solyc01g109880.2.1	BZIP transcription factor (AHRD V1 ***- C0KYN1_SOLLC); contains Interpro domain(s) IPR011700 Basic leucine zipper	ocs element-binding factor 1-like
Solyc01g107560.2.1	UDP-glucosyltransferase 1 (AHRD V1 **** C6ZRH7_CAPAN); contains Interpro domain(s) IPR002213 UDP-glucuronosyl/UDP-glucosyltransferase	cinnamate beta-d-glucosyltransferase-like
Solyc01g107460.2.1	Unknown Protein (AHRD V1)	PREDICTED: uncharacterized protein LOC101248432
Solyc01g108330.2.1	Unknown Protein (AHRD V1)	PREDICTED: uncharacterized protein LOC101244813
Solyc01g109140.2.1	Cytochrome P450	9-divinyl ether synthase-like
Solyc01g110580.2.1	Auxin-induced SAUR-like protein (AHRD V1 **-- Q8S349_CAPAN); contains Interpro domain(s) IPR003676 Auxin responsive SAUR protein	indole-3-acetic acid-induced protein arg7-like
Solyc01g112060.2.1	NmrA family protein (AHRD V1 **-- B2J8Q2_NOSP7); contains Interpro domain(s) IPR016040 NAD(P)-binding domain	nad -binding rossmann-fold superfamily protein
Solyc01g107660.2.1	Stress enhanced protein 1 (Fragment) (AHRD V1 *-*- C6JT32_9MYRT)	stress enhanced protein 1
Solyc01g111990.2.1	Alanyl-tRNA synthetase (AHRD V1 **** Q9FFC7_ARATH); contains Interpro domain(s) IPR002318 Alanyl-tRNA synthetase, class IIc	probable alanine--trna chloroplastic-like
Solyc01g111040.2.1	EF-Hand containing protein-like (AHRD V1 ***- Q9T0I9_ARATH); contains Interpro domain(s) IPR018248 EF hand	39 kda ef-hand containing protein
Solyc01g109460.2.1	Solute carrier family 2, facilitated glucose transporter member 3 (AHRD V1 ***- GTR3_RAT); contains Interpro domain(s) IPR003663 Sugar/inositol transporter	polyol transporter 5-like
Solyc01g110940.2.1	Auxin-induced SAUR-like protein (AHRD V1 ***- Q8S351_CAPAN); contains Interpro domain(s) IPR003676 Auxin responsive SAUR protein	auxin-induced protein 15a-like
Solyc01g109790.2.1	Glucose-1-phosphate adenylyltransferase (AHRD V1 **** Q15I66_SOLLC); contains Interpro domain(s) IPR011831 Glucose-1-phosphate adenylyltransferase IPR005836 ADP-glucose pyrophosphorylase, conserved site	adp-glucose pyrophosphorylase large subunit
Solyc01g108400.2.1	Calcium-dependent protein kinase-like (AHRD V1 **** Q9LET1_ARATH); contains Interpro domain(s) IPR002290 Serine/threonine protein kinase	cdpk-related kinase 5-like
Solyc01g111300.2.1	Cold shock protein-1 (AHRD V1 *-*- Q8LPA7_WHEAT); contains Interpro domain(s) IPR002059 Cold-shock protein, DNA-binding	glycine-rich protein 2-like
Solyc01g110610.2.1	Auxin-induced SAUR-like protein (AHRD V1 **-- Q8S349_CAPAN); contains Interpro domain(s) IPR003676 Auxin responsive SAUR protein	auxin-induced protein 15a-like
Solyc01g110780.1.1	Auxin-induced SAUR-like protein (AHRD V1 ***- Q8S351_CAPAN); contains Interpro domain(s) IPR003676 Auxin responsive SAUR protein	auxin-induced protein 15a-like
Solyc01g107980.2.1	U-box domain-containing protein (AHRD V1 ***- A8IXJ0_BRACM); contains Interpro domain(s) IPR011989 Armadillo-like helical	u-box domain-containing protein 26-like
Solyc01g109090.2.1	Unknown Protein (AHRD V1)	PREDICTED: uncharacterized protein LOC100812889
Solyc01g109250.2.1	TMV response-related protein (AHRD V1 **-- B6SLK0_MAIZE)	PREDICTED: uncharacterized protein LOC101261073
Solyc01g107820.2.1	UDP-glucosyltransferase family 1 protein (AHRD V1 **** C6KI43_CITSI); contains Interpro domain(s) IPR002213 UDP-glucuronosyl/UDP-glucosyltransferase	scopoletin glucosyltransferase-like
Solyc01g109380.2.1	Unknown Protein (AHRD V1); contains Interpro domain(s) IPR007749 Protein of unknown function DUF677	upf0496 protein at4g34320-like
Solyc01g111830.2.1	24-sterol C-methyltransferase (AHRD V1 **** B0FDL7_GOSHI); contains Interpro domain(s) IPR013705 Sterol methyltransferase C-terminal	24-methylenesterol c-methyltransferase 2-like
Solyc01g109800.2.1	Genomic DNA chromosome 5 TAC clone K1F13 (AHRD V1 *-*- Q9FJZ5_ARATH)	PREDICTED: uncharacterized protein LOC101244426
Solyc01g108520.1.1	Acetyl esterase (AHRD V1 *--- AES_ECOL6); contains Interpro domain(s) IPR013094 Alpha/beta hydrolase fold-3	probable carboxylesterase 2-like
Solyc01g109100.2.1	Unknown Protein (AHRD V1)	conserved hypothetical protein
Solyc01g109860.2.1	Phosphatidylinositol/phosphatidylcholine transfer protein-like (AHRD V1 **-* Q9LRX7_ARATH); contains Interpro domain(s) IPR001251 Cellular retinaldehyde-binding/triple function, C-terminal	phosphatidylinositol phosphatidylcholine transfer protein sfh3-like
Solyc01g109690.1.1	Myb family transcription factor (Fragment) (AHRD V1 **** D7KSM0_ARALY); contains Interpro domain(s) IPR017884 SANT, eukarya	protein radialis-like 6-like
Solyc01g111630.2.1	Glyoxylate/hydroxypyruvate reductase B (AHRD V1 **** GHRB_YERPS); contains Interpro domain(s) IPR006140 D-isomer specific 2-hydroxyacid dehydrogenase, NAD-binding	hydroxypyruvate reductase
Solyc01g107650.2.1	Receptor like kinase, RLK	probable lrr receptor-like serine threonine-protein kinase at4g37250-like
Solyc01g107430.2.1	Zinc finger protein 7 (AHRD V1 ***- B6U599_MAIZE); contains Interpro domain(s) IPR007087 Zinc finger, C2H2-type	zinc finger protein 7-like
Solyc01g111970.2.1	Laccase 1a (AHRD V1 **-- B9IG56_POPTR); contains Interpro domain(s) IPR001117 Multicopper oxidase, type 1	l-ascorbate oxidase homolog
Solyc01g108630.2.1	Nitrite reductase (AHRD V1 ***- Q76KB0_TOBAC); contains Interpro domain(s) IPR006067 Nitrite and sulphite reductase 4Fe-4S region	nitrite reductase
Solyc01g109810.2.1	Genomic DNA chromosome 5 TAC clone K1F13 (AHRD V1 ***- Q9FJZ5_ARATH)	PREDICTED: uncharacterized protein LOC101244426
Solyc01g109700.2.1	Transcription factor (AHRD V1 *-** D6MKM4_9ASPA); contains Interpro domain(s) IPR011598 Helix-loop-helix DNA-binding	transcription factor bhlh63-like
Solyc01g112000.2.1	Expansin-like protein (AHRD V1 ***- A7X331_SOLLC); contains Interpro domain(s) IPR007112 Expansin 45, endoglucanase-like IPR007117 Pollen allergen/expansin, C-terminal	expansin-like protein precursor
Solyc01g108490.2.1	Serine carboxypeptidase 1 (AHRD V1 **** B6SW38_MAIZE); contains Interpro domain(s) IPR001563 Peptidase S10, serine carboxypeptidase	serine carboxypeptidase ii-3-like
Solyc01g111840.2.1	MFS-type drug efflux transporter P55 (AHRD V1 *--* MFS55_MYCTU); contains Interpro domain(s) IPR016196 Major facilitator superfamily, general substrate transporter	hippocampus abundant transcript-like protein 1-like
Solyc01g109040.2.1	Plastoquinol-plastocyanin reductase (AHRD V1 **-* B6SRD7_MAIZE); contains Interpro domain(s) IPR012595 PetM of cytochrome b6/f complex subunit 7	cytochrome p450 isoform 2
Solyc01g110360.2.1	Fructose-bisphosphate aldolase (AHRD V1 ***- B0FPD8_SOLTU); contains Interpro domain(s) IPR000741 Fructose-bisphosphate aldolase, class-I	probable fructose-bisphosphate aldolase chloroplastic-like
